# Supplementary material for: Coverage with Timely Administered Vaccination against Hepatitis B Virus and Its Influence on the Prevalence of HBV Infection in the Regions of Different Endemicity
Source: MDPI journal article supplement (doi:10.3390/vaccines9020082), 2021-01-23
Supplement: s1 [file s1]

## SURVEY ON ATTITUDE TO VACCINATION

*INTERVIEWER, READ OUT:* " Hello, my name is \_\_\_\_\_. I conduct a survey on attitude towards vaccination.

### SECTION 1. RESPONDENT SELECTION

Do you agree to participate in the survey?

|   |     |   |                                 |
|---|-----|---|---------------------------------|
| 1 | Yes | 2 | No => <i>Stop the interview</i> |
|---|-----|---|---------------------------------|

### SECTION 2. TECHNICAL INFORMATION

2.1 Interviewer ID: |\_\_\_\_| |\_\_\_\_| |\_\_\_\_| |\_\_\_\_|

2.2 Date of interview, Day: |\_\_\_\_| |\_\_\_\_| Month: |\_\_\_\_| |\_\_\_\_|

2.3 Interview start time, Hours: |\_\_\_\_| |\_\_\_\_| Minutes: |\_\_\_\_| |\_\_\_\_|

2.4 Institution name: \_\_\_\_\_

2.5 Place: \_\_\_\_\_

### SECTION 3. RESPONDENT INFORMATION

*INTERVIEWER, READ OUT:* First, I will ask you a few questions about you.

#### 3.1 *INTERVIEWER, INDICATE THE GENDER OF THE RESPONDENT*

|   |      |   |        |
|---|------|---|--------|
| 1 | Male | 2 | Female |
|---|------|---|--------|

3.2 How old are you? \_\_\_\_\_

3.3. What education do you have? *INTERVIEWER, SPECIFY STUDENT OR TEACHER*

|   |         |   |         |
|---|---------|---|---------|
| 1 | Student | 2 | Teacher |
|---|---------|---|---------|

## SECTION 4. KNOWLEDGE OF VACCINATION

**4.1 Please name the ways to prevent dangerous infections such as tuberculosis, hepatitis, diphtheria, measles, etc.?** (*respondents were not prompted with a list of possible answers*)

|   |                                         |
|---|-----------------------------------------|
| 1 | Compliance with the rules of hygiene    |
| 2 | Physical activity and tempering         |
| 3 | Healthy food, quality of drinking water |
| 4 | Vaccination                             |
| 5 | Immunomodulators                        |
| 6 | Vitamins/dietary supplements            |
| 7 | There are no such ways                  |
| 8 | Other (INDICATE)                        |

**4.2. Do you know what vaccination is?**

|   |     |   |    |
|---|-----|---|----|
| 1 | Yes | 2 | No |
|---|-----|---|----|

*INTERVIEWER, IF RESPONDENT ANSWERED NO, EXPLAIN THAT* Vaccination is the use of prophylactic immunizations in order to induce immunity to the disease, which will prevent infection or reduce its negative effects.

**4.3 What infections do you think can be prevented by vaccination?** (*respondents were not prompted with a list of possible answers*)

|  |
|--|
|  |
|  |
|  |

**4.4 INTERVIEWER, ASK A QUESTION ABOUT ALL INFECTIONS NOT MENTIONED BY RESPONDENT. Have you heard that /INFECTION NAME/ can be prevented by vaccination?**

|                         | <b>Variant 4.4 (a)</b><br>Spontaneous mention | <b>Variant 4.4 (b)</b><br>Mention with hint |
|-------------------------|-----------------------------------------------|---------------------------------------------|
| Diphtheria              |                                               |                                             |
| Measles                 |                                               |                                             |
| Tetanus                 |                                               |                                             |
| Hepatitis A             |                                               |                                             |
| Hepatitis B             |                                               |                                             |
| Mumps                   |                                               |                                             |
| Poliomyelitis           |                                               |                                             |
| Influenza               |                                               |                                             |
| Rubella                 |                                               |                                             |
| Rabies                  |                                               |                                             |
| Chickenpox              |                                               |                                             |
| Human papillomavirus    |                                               |                                             |
| Tick-borne encephalitis |                                               |                                             |
| Yellow fever            |                                               |                                             |
| Meningococcal infection |                                               |                                             |

## SECTION 5. ATTITUDE TOWARDS THE VACCINATION

### 5.1 Heard about the National Vaccination Schedule

|   |     |   |    |
|---|-----|---|----|
| 1 | Yes | 2 | No |
|---|-----|---|----|

### 5.2. Vaccination fears *(multiple answer choices, a list of possible answers was read out)*

|    |                                                                   |
|----|-------------------------------------------------------------------|
| 1  | Have no fears about vaccination                                   |
| 2  | Children receive too many vaccines in the first two years of life |
| 3  | Vaccines can cause side effects or complications                  |
| 4  | Vaccines can weaken the immune system of children and adults      |
| 5  | Vaccines can cause disease                                        |
| 6  | The ingredients in vaccines are unsafe                            |
| 7  | The long-term effects of vaccines on humans have not been studied |
| 8  | Vaccination is against my religious beliefs                       |
| 9  | The quality of vaccines is low                                    |
| 10 | Other                                                             |

### 5.3. Have you or your relatives/acquaintances encountered illness/medical complications in children caused by vaccination?

|   |     |   |    |
|---|-----|---|----|
| 1 | Yes | 2 | No |
|---|-----|---|----|

### 5.4 Have you or your relatives/acquaintances encountered serious illness that could have been prevented by vaccination?

|   |     |   |    |
|---|-----|---|----|
| 1 | Yes | 2 | No |
|---|-----|---|----|

### 5.5 There are people/groups of people who refuse to vaccinate themselves and their children. How do you feel about their decision? *(Choose one answer from the list)*

|   |                                                                                            |
|---|--------------------------------------------------------------------------------------------|
| 1 | I disagree. They risk the health of their children and contribute to the spread of disease |
| 2 | I do not care. They are entitled to their opinion                                          |
| 3 | I agree with them                                                                          |
| 4 | I haven't heard anything about this                                                        |
| 5 | Other                                                                                      |

### 5.6 Do you trust healthcare providers who vaccinate? *(Choose one answer from the list)*

|   |                            |
|---|----------------------------|
| 1 | I completely trust them    |
| 2 | I mostly trust them        |
| 3 | No opinion                 |
| 4 | I mostly do not trust them |
| 5 | I do not trust them at all |

**5.7 Do you trust the quality of vaccines?** *(Choose one answer from the list)*

|   |                                               |
|---|-----------------------------------------------|
| 1 | I completely trust the quality of vaccines    |
| 2 | I mostly trust the quality of vaccines        |
| 3 | No opinion                                    |
| 4 | I mostly do not trust the quality of vaccines |
| 5 | I do not trust the quality of vaccines at all |

**5.8 What information about vaccinations would you like to receive?** *(Choose any answers from the list)*

|   |                                                              |
|---|--------------------------------------------------------------|
| 1 | Information about the usefulness and benefits of vaccination |
| 2 | Information about additional vaccines                        |
| 3 | Information about vaccine composition                        |
| 4 | Information about contraindications to vaccination           |
| 5 | Information about complications after vaccination            |
| 6 | Information about the manufacturers of vaccines              |
| 7 | Other                                                        |
| 8 | I have enough information                                    |

*INTERVIEWER, PLEASE THANK THE RESPONDENT*
